# Supplementary material for: Isolation and Characterization of the Primary Marmoset (Callithrix jacchus) Retinal Pigment Epithelial Cells
Source: MDPI journal article supplement (doi:10.3390/cells12121644), 2023-06-16
Supplement: s1 [file s1]

## Supplementary Materials:

**Table S1.** List of used antibodies.

| Antibody                                             | Company                   | Catalog No.  | Dilution   |
|------------------------------------------------------|---------------------------|--------------|------------|
| ZO-1 antibody, Alexa Fluor™ 594                      | Invitrogen                | 339194       | 1:100(IHC) |
| Phalloidin antibody, Alex Fluor™ 488                 | Invitrogen                | A12379       | 1:100(IHC) |
| Antibody rabbit anti-occludin                        | Cell signaling technology | 91131        | 1:100(IHC) |
| Anti-rabbit IgG secondary antibody, Alexa Fluor™ 488 | Invitrogen                | A11008       | 1:200(IHC) |
| Antibody rabbit anti-ZO-1                            | Cell signaling technology | 8193         | 1:1000(WB) |
| Antibody rabbit anti-E-Cadherin                      | Cell signaling technology | 3195         | 1:1000(WB) |
| Antibody mouse anti-Ezrin                            | ThermoFisher Scientific   | 3C12         | 1:1000(WB) |
| Antibody mouse anti-RPE65                            | Novus Biologicals         | 401.8B11.3D9 | 1:500(WB)  |
| Antibody mouse anti-F-actin                          | Abcam                     | AB205        | 1:500(WB)  |
| Antibody rabbit anti-GAPDH                           | Cell signaling technology | 5174         | 1:1000(WB) |
| Antibody mouse anti-p53                              | Santa Cruz Biotechnology  | sc-126       | 1:200(WB)  |
| Antibody mouse anti-p21                              | Santa Cruz Biotechnology  | sc-6246      | 1:200(WB)  |
| Antibody rabbit anti-CDK2                            | Cell signaling technology | 2546         | 1:1000(WB) |
| Antibody rabbit anti-CDK4                            | Cell signaling technology | 12790        | 1:1000(WB) |
| Antibody mouse anti-CDK6                             | Cell signaling technology | 3136         | 1:1000(WB) |
| Antibody mouse anti- Cyclin A2                       | Cell signaling technology | 4656         | 1:1000(WB) |
| Antibody mouse anti- Cyclin D1                       | Cell signaling technology | 2926         | 1:1000(WB) |
| Antibody rabbit anti- Cyclin E2                      | Cell signaling technology | 4132         | 1:1000(WB) |
| Anti-rabbit IgG                                      | Cell signaling technology | 7074         | 1:2000(WB) |
| Anti-mouse IgG                                       | Cell signaling technology | 7076         | 1:2000(WB) |
